# Supplementary material for: High-throughput malaria serosurveillance using a one-step multiplex bead assay
Source: Springer Nature journal article supplement (doi:10.1186/s12936-019-3027-0), 2019-12-01
Supplement: 12936_2019_3027_MOESM2_ESM.pdf [file 12936_2019_3027_MOESM2_ESM.pdf]

## Additional File 2

| <b>Antigen</b>    | <b>Sample Type</b> | <b>Protocol</b> | <b>Component 1<br/>lognormal mean<br/>(variance)</b> | <b>Component 2<br/>lognormal mean<br/>(variance)</b> | <b>Δ lognormal<br/>means C1 vs C2</b> |
|-------------------|--------------------|-----------------|------------------------------------------------------|------------------------------------------------------|---------------------------------------|
| <b>PfMSP1-19</b>  | Serum              | Standard        | 3.6 (0.50)                                           | 8.1 (3.64)                                           | 4.5                                   |
|                   |                    | OneStep         | 4.7 (2.65)                                           | 10.5 (0.29)                                          | 5.8                                   |
|                   | Blood Elution      | Standard        | 3.5 (0.25)                                           | 7.3 (4.21)                                           | 3.8                                   |
|                   |                    | OneStep         | 4.0 (0.71)                                           | 10.1 (1.43)                                          | 6.1                                   |
| <b>PvMSP1-19</b>  | Serum              | Standard        | 4.2 (0.25)                                           | 5.6 (1.9)                                            | 1.4                                   |
|                   |                    | OneStep         | 4.1 (0.45)                                           | 6.0 (2.66)                                           | 1.9                                   |
|                   | Blood Elution      | Standard        | 4.1 (0.19)                                           | 5.3 (1.17)                                           | 1.2                                   |
|                   |                    | OneStep         | 4.2 (0.25)                                           | 5.6 (1.9)                                            | 1.4                                   |
| <b>PmMSP1-19</b>  | Serum              | Standard        | 3.7 (0.26)                                           | 5.5 (1.84)                                           | 1.8                                   |
|                   |                    | OneStep         | 3.9 (0.35)                                           | 6.2 (2.89)                                           | 2.3                                   |
|                   | Blood Elution      | Standard        | 4.1 (0.18)                                           | 5.5 (0.85)                                           | 1.4                                   |
|                   |                    | OneStep         | 4.2 (0.27)                                           | 6.2 (2.15)                                           | 2.0                                   |
| <b>PfCSP</b>      | Serum              | Standard        | 3.7 (0.45)                                           | 6.1 (3.28)                                           | 2.4                                   |
|                   |                    | OneStep         | 4.1 (0.66)                                           | 7.5 (4.14)                                           | 3.4                                   |
|                   | Blood Elution      | Standard        | 3.5 (0.31)                                           | 5.7 (2.85)                                           | 2.2                                   |
|                   |                    | OneStep         | 4.1 (0.38)                                           | 7.4 (4.41)                                           | 3.3                                   |
| <b>PfAMA1</b>     | Serum              | Standard        | 4.1 (0.84)                                           | 7.8 (2.85)                                           | 3.7                                   |
|                   |                    | OneStep         | 5.4 (3.04)                                           | 10.3 (0.28)                                          | 4.9                                   |
|                   | Blood Elution      | Standard        | 3.9 (0.49)                                           | 7.1 (3.48)                                           | 3.2                                   |
|                   |                    | OneStep         | 4.5 (0.85)                                           | 9.6 (2.05)                                           | 5.1                                   |
| <b>PfLSA1</b>     | Serum              | Standard        | 3.4 (0.23)                                           | 4.7 (4.57)                                           | 1.3                                   |
|                   |                    | OneStep         | 4.0 (0.53)                                           | 6.8 (4.39)                                           | 2.8                                   |
|                   | Blood Elution      | Standard        | 3.2 (0.15)                                           | 4.9 (3.15)                                           | 1.7                                   |
|                   |                    | OneStep         | 3.9 (0.30)                                           | 7.0 (4.55)                                           | 3.1                                   |
| <b>PfGLURP-R0</b> | Serum              | Standard        | 3.6 (0.21)                                           | 5.1 (6.12)                                           | 1.5                                   |
|                   |                    | OneStep         | 4.1 (0.54)                                           | 7.0 (4.19)                                           | 2.9                                   |
|                   | Blood Elution      | Standard        | 3.4 (0.18)                                           | 5.9 (4.37)                                           | 2.5                                   |
|                   |                    | OneStep         | 4.0 (0.28)                                           | 7.4 (5.42)                                           | 3.4                                   |
| <b>HRP2</b>       | Serum              | Standard        | 3.9 (0.34)                                           | 6.0 (2.98)                                           | 2.1                                   |
|                   |                    | OneStep         | 4.4 (0.59)                                           | 7.1 (4.02)                                           | 2.7                                   |
|                   | Blood Elution      | Standard        | 4.0 (0.24)                                           | 5.7 (1.99)                                           | 1.7                                   |
|                   |                    | OneStep         | 4.3 (0.3)                                            | 7.1 (3.62)                                           | 2.8                                   |
