# Supplementary material for: High-throughput malaria serosurveillance using a one-step multiplex bead assay
Source: Springer Nature journal article supplement (doi:10.1186/s12936-019-3027-0), 2019-12-01

# Additional File 4

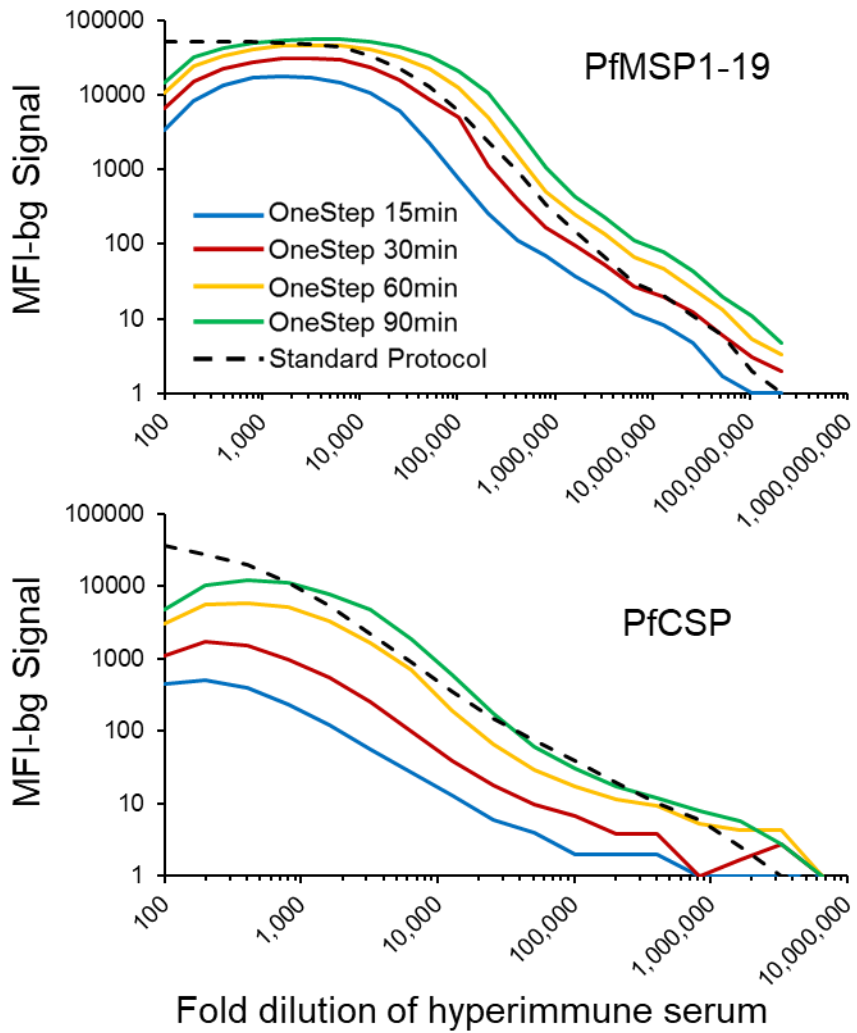

Supplement: 12936_2019_3027_MOESM4_ESM.pdf [file 12936_2019_3027_MOESM4_ESM.pdf]
